# Supplementary material for: Utilization and Regional Differences of In-Patient Services for Peripheral Arterial Disease and Acute Limb Ischemia in Germany: Secondary Analysis of Nationwide DRG Data
Source: MDPI journal article supplement (doi:10.3390/jcm11082116), 2022-04-11
Supplement: s1 [file s1]

## Supplementary Material:

**Table S1:** Definition of cases according to ICD-10-GM.

|                                     | 2005–2014        | 2015–2018        |
|-------------------------------------|------------------|------------------|
| <b>PAD Fontaine stage I/IIa</b>     | I70.20           | I70.20<br>I70.21 |
| <b>PAD Fontaine stage IIb</b>       | I70.21           | I70.22           |
| <b>PAD Fontaine stage III</b>       | I70.22           | I70.23           |
| <b>PAD Fontaine stage IV</b>        | I70.23<br>I70.24 | I70.24<br>I70.25 |
| <b>Arterial embolism/thrombosis</b> | I74.*            | I74.*            |

ICD-10-GM indicates International Statistical Classification of Diseases and Related Health Problems, 10<sup>th</sup> version, German Modification; PAD, peripheral arterial disease.

**Table S2:** Case definitions of surgical procedures (A1–A3), endovascular procedures (B), procedures to treat arterial embolism or thrombosis (C), and amputations (D), according to the Operation and Procedure Classification System (OPS) between 2005 and 2008 (source: www.dimdi.de, accessed on 11 March 2022).

| (A1) Endarterectomy, patch angioplasty, and other surgical procedures:                                                                                                  |                                                                                      |                                                                                                                                                                                  |                       |
|-------------------------------------------------------------------------------------------------------------------------------------------------------------------------|--------------------------------------------------------------------------------------|----------------------------------------------------------------------------------------------------------------------------------------------------------------------------------|-----------------------|
| OPS Code                                                                                                                                                                | Description                                                                          | Localisation: 5 <sup>th</sup> /6 <sup>th</sup> figure * =                                                                                                                        |                       |
| 5-381.**                                                                                                                                                                | Endarterectomy and patch angioplasty                                                 | .33/.34/.35                      Aorta<br>.5* without .51                Iliac<br>.7*                                Above knee<br>.8*                                Below knee |                       |
| 5-382.**                                                                                                                                                                | Resection of blood vessels                                                           |                                                                                                                                                                                  |                       |
| 5-383.**                                                                                                                                                                | Resection and interposition grafting                                                 |                                                                                                                                                                                  |                       |
| 5-388.**                                                                                                                                                                | Suture of blood vessels                                                              |                                                                                                                                                                                  |                       |
| 5-389.**                                                                                                                                                                | Surgical occlusion                                                                   |                                                                                                                                                                                  |                       |
| 5-395.**                                                                                                                                                                | Patch angioplasty                                                                    |                                                                                                                                                                                  |                       |
| 5-396.**                                                                                                                                                                | Transposition                                                                        |                                                                                                                                                                                  |                       |
| 5-397.**                                                                                                                                                                | Other reconstructions                                                                |                                                                                                                                                                                  |                       |
| Codes .35/.56/.73/.87 „Vascular prosthesis“ only exist since 2010.                                                                                                      |                                                                                      |                                                                                                                                                                                  |                       |
| (A2) Bypasses including prostheses:                                                                                                                                     |                                                                                      |                                                                                                                                                                                  |                       |
| OPS: 5-393.**                                                                                                                                                           | Localisation of proximal anastomosis:<br>5 <sup>th</sup> /6 <sup>th</sup> figure * = | Localisation of distal anastomosis:<br>5 <sup>th</sup> /6 <sup>th</sup> figure * =                                                                                               |                       |
| Axillary /<br>subclavian<br>artery                                                                                                                                      | .13/.14/.17/.18                                                                      | –                                                                                                                                                                                |                       |
| Aorta                                                                                                                                                                   | .3* without .30/.31/.32                                                              | –                                                                                                                                                                                |                       |
| Iliac artery                                                                                                                                                            | .4* without .48/.49                                                                  | .33/.35<br>.41                                                                                                                                                                   |                       |
| Femoral artery                                                                                                                                                          | .5*                                                                                  | .13/.14/.17/.18<br>.36/.42/.51/.57                                                                                                                                               |                       |
| Popliteal<br>artery                                                                                                                                                     | .6*                                                                                  | .38                                                                                                                                                                              | Not further specified |
|                                                                                                                                                                         |                                                                                      | .43                                                                                                                                                                              |                       |
|                                                                                                                                                                         |                                                                                      | .52                                                                                                                                                                              |                       |
|                                                                                                                                                                         |                                                                                      | .44/.53                                                                                                                                                                          | Above knee            |
|                                                                                                                                                                         |                                                                                      | .45/.54                                                                                                                                                                          | Below knee            |
| Crural artery                                                                                                                                                           | .7*                                                                                  | .46/.55/.61                                                                                                                                                                      |                       |
| Pedal artery                                                                                                                                                            | -                                                                                    | .56/.62                                                                                                                                                                          |                       |
| Codes .34 „aorto-biiliacal“ and .39 „aorto-bipopliteal“ only existed until 2006. Codes .9* „temporary arterio-arterial shunt (intraoperative)“ and .x/.y were excluded. |                                                                                      |                                                                                                                                                                                  |                       |
| (A3) Surgical revisions:                                                                                                                                                |                                                                                      |                                                                                                                                                                                  |                       |
| OPS: 5-394.*                                                                                                                                                            | Description                                                                          | Localisation:                                                                                                                                                                    |                       |
| .0                                                                                                                                                                      | Surgical treatment of bleeding after vascular operation                              | Unspecific localisation, no 6 <sup>th</sup> figure intended                                                                                                                      |                       |
| .1                                                                                                                                                                      | Surgical revision of anastomosis                                                     |                                                                                                                                                                                  |                       |
| .2                                                                                                                                                                      | Surgical revision of vascular implant                                                |                                                                                                                                                                                  |                       |
| .3                                                                                                                                                                      | Replacement of vascular implant                                                      |                                                                                                                                                                                  |                       |
| .4                                                                                                                                                                      | Resection of vascular implant                                                        |                                                                                                                                                                                  |                       |

| (B) Balloon angioplasties and stent implantations:                                                                                                                                                                                                                                                                                                                                                                                                                                                                                                                          |                                                                                                                          |                                                                                                |                                          |                                    |
|-----------------------------------------------------------------------------------------------------------------------------------------------------------------------------------------------------------------------------------------------------------------------------------------------------------------------------------------------------------------------------------------------------------------------------------------------------------------------------------------------------------------------------------------------------------------------------|--------------------------------------------------------------------------------------------------------------------------|------------------------------------------------------------------------------------------------|------------------------------------------|------------------------------------|
| #E1.*                                                                                                                                                                                                                                                                                                                                                                                                                                                                                                                                                                       | OPS Code                                                                                                                 | Description                                                                                    | Localisation: 6 <sup>th</sup> figure * = |                                    |
| #E1.1                                                                                                                                                                                                                                                                                                                                                                                                                                                                                                                                                                       | 8-836.0*                                                                                                                 | PTA                                                                                            | .4                                       | Aorta                              |
|                                                                                                                                                                                                                                                                                                                                                                                                                                                                                                                                                                             |                                                                                                                          |                                                                                                | .c                                       | Arteries of lower leg              |
|                                                                                                                                                                                                                                                                                                                                                                                                                                                                                                                                                                             |                                                                                                                          |                                                                                                | .e                                       | Artificial vessels                 |
|                                                                                                                                                                                                                                                                                                                                                                                                                                                                                                                                                                             |                                                                                                                          |                                                                                                | .q                                       | Other abdominal or pelvic arteries |
|                                                                                                                                                                                                                                                                                                                                                                                                                                                                                                                                                                             |                                                                                                                          |                                                                                                | .s                                       | Arteries of thigh                  |
|                                                                                                                                                                                                                                                                                                                                                                                                                                                                                                                                                                             |                                                                                                                          |                                                                                                | .x                                       | Others                             |
| #E1.2                                                                                                                                                                                                                                                                                                                                                                                                                                                                                                                                                                       | 8-836.1*<br>8-836.2*                                                                                                     | Blade-Angioplasty<br>Laser-Angioplasty                                                         | .4                                       | Aorta                              |
|                                                                                                                                                                                                                                                                                                                                                                                                                                                                                                                                                                             |                                                                                                                          |                                                                                                | .c                                       | Arteries of lower leg              |
|                                                                                                                                                                                                                                                                                                                                                                                                                                                                                                                                                                             |                                                                                                                          |                                                                                                | .e                                       | Artificial vessels                 |
|                                                                                                                                                                                                                                                                                                                                                                                                                                                                                                                                                                             |                                                                                                                          |                                                                                                | .h                                       | Other abdominal or pelvic arteries |
|                                                                                                                                                                                                                                                                                                                                                                                                                                                                                                                                                                             |                                                                                                                          |                                                                                                | .k                                       | Arteries of thigh                  |
|                                                                                                                                                                                                                                                                                                                                                                                                                                                                                                                                                                             |                                                                                                                          |                                                                                                | .x                                       | Others                             |
| #E1.3                                                                                                                                                                                                                                                                                                                                                                                                                                                                                                                                                                       | 8-840.0*<br>until .5* 8-<br>841.0* until .5*<br>8-843.0*<br>until .5*<br>8-844.0*<br>until .5*<br>8-845.0*<br>until .1*q | Stent implantation                                                                             | .4                                       | Aorta                              |
|                                                                                                                                                                                                                                                                                                                                                                                                                                                                                                                                                                             |                                                                                                                          |                                                                                                | .c                                       | Arteries of lower leg              |
|                                                                                                                                                                                                                                                                                                                                                                                                                                                                                                                                                                             |                                                                                                                          |                                                                                                | .e                                       | Artificial vessels                 |
|                                                                                                                                                                                                                                                                                                                                                                                                                                                                                                                                                                             |                                                                                                                          |                                                                                                | .q                                       | Other abdominal or pelvic arteries |
|                                                                                                                                                                                                                                                                                                                                                                                                                                                                                                                                                                             |                                                                                                                          |                                                                                                | .s                                       | Arteries of thigh                  |
|                                                                                                                                                                                                                                                                                                                                                                                                                                                                                                                                                                             |                                                                                                                          |                                                                                                | .x                                       | Others                             |
| #E1.4                                                                                                                                                                                                                                                                                                                                                                                                                                                                                                                                                                       | 8-83c.7*                                                                                                                 | Intraarterial spasmolysis                                                                      | No information on localisation           |                                    |
| #E1.5                                                                                                                                                                                                                                                                                                                                                                                                                                                                                                                                                                       | 8-84d                                                                                                                    | (Percutaneous) transluminal<br>implantation of woven nitinol<br>stents                         | .4                                       | Aorta                              |
|                                                                                                                                                                                                                                                                                                                                                                                                                                                                                                                                                                             |                                                                                                                          |                                                                                                | .c                                       | Arteries of lower leg              |
|                                                                                                                                                                                                                                                                                                                                                                                                                                                                                                                                                                             |                                                                                                                          |                                                                                                | .e                                       | Artificial vessels                 |
|                                                                                                                                                                                                                                                                                                                                                                                                                                                                                                                                                                             |                                                                                                                          |                                                                                                | .q                                       | Other abdominal or pelvic arteries |
|                                                                                                                                                                                                                                                                                                                                                                                                                                                                                                                                                                             |                                                                                                                          |                                                                                                | .s                                       | Arteries of thigh                  |
|                                                                                                                                                                                                                                                                                                                                                                                                                                                                                                                                                                             |                                                                                                                          |                                                                                                | .x                                       | Others                             |
| #E1.6                                                                                                                                                                                                                                                                                                                                                                                                                                                                                                                                                                       | 8-849.0*<br>8-849.1*                                                                                                     | (Percutaneous) transluminal<br>implantation of other<br>uncovered large-bore<br>(>16mm) stents | .4                                       | Aorta                              |
|                                                                                                                                                                                                                                                                                                                                                                                                                                                                                                                                                                             |                                                                                                                          |                                                                                                | .c                                       | Arteries of lower leg              |
|                                                                                                                                                                                                                                                                                                                                                                                                                                                                                                                                                                             |                                                                                                                          |                                                                                                | .e                                       | Artificial vessels                 |
|                                                                                                                                                                                                                                                                                                                                                                                                                                                                                                                                                                             |                                                                                                                          |                                                                                                | .q                                       | Other abdominal or pelvic arteries |
|                                                                                                                                                                                                                                                                                                                                                                                                                                                                                                                                                                             |                                                                                                                          |                                                                                                | .s                                       | Arteries of thigh                  |
|                                                                                                                                                                                                                                                                                                                                                                                                                                                                                                                                                                             |                                                                                                                          |                                                                                                | .x                                       | Others                             |
| 8-836.0*: q: Until 2014: .09: „Other abdominal arteries“, from 2015: .09: „Other abdominal or pelvic arteries“, from 2017: .0q<br>s: Until 2016: .0b „Arteries of thigh“, from 2017: .0s. 8-836.1/2*: h: Until 2014: .9: „Other abdominal arteries“, from 2015: .9:<br>“Other abdominal or pelvic arteries”, from 2017: .h. k: Until 2016: .b “Arteries of thigh”, from 2017: k. 8-83c.7*: Exists only<br>since 2012, previously not available. 8-84d not available before 2018. 8-849.0*/1*: Exists only since 2009, previously not<br>available, q/s similar to stenting. |                                                                                                                          |                                                                                                |                                          |                                    |
| (C) Procedures to treat arterial embolism / thrombosis:                                                                                                                                                                                                                                                                                                                                                                                                                                                                                                                     |                                                                                                                          |                                                                                                |                                          |                                    |
| OPS Code                                                                                                                                                                                                                                                                                                                                                                                                                                                                                                                                                                    | Description                                                                                                              | Localisation: 5 <sup>th</sup> /6 <sup>th</sup> figure * =                                      |                                          |                                    |
| 5-380.**                                                                                                                                                                                                                                                                                                                                                                                                                                                                                                                                                                    | Incision, embolectomy                                                                                                    | .33/.34/.35                                                                                    | Aorta                                    |                                    |
|                                                                                                                                                                                                                                                                                                                                                                                                                                                                                                                                                                             |                                                                                                                          | .5* without .51                                                                                | Iliac artery                             |                                    |
|                                                                                                                                                                                                                                                                                                                                                                                                                                                                                                                                                                             |                                                                                                                          | .7*                                                                                            | Above knee                               |                                    |
|                                                                                                                                                                                                                                                                                                                                                                                                                                                                                                                                                                             |                                                                                                                          | .8*                                                                                            | Below knee                               |                                    |

|          |                                    | Including „Vascular prosthesis at given localisation“ |                                    |
|----------|------------------------------------|-------------------------------------------------------|------------------------------------|
| 8-836.3* | Atherectomy                        | . *4                                                  | Aorta                              |
| 8-836.7* | Selektive Thrombolysis             | . *c                                                  | Arteries of lower leg              |
| 8-836.8* | Thrombektomy (excluding rotational | . *e                                                  | Artificial vessels                 |
| 8-836.p* | thrombectomy)                      | . *h                                                  | Other abdominal or pelvic arteries |
| 8-836.r* | Rotational thrombectomy            | . *k                                                  | Arteries of thigh                  |
|          | Kryoplasty                         | . *x                                                  | Others                             |

5-380\*\*: Until 2009, .35/.56/.73/.87 did not exist. Codes cover „vascular prostheses“ and were introduced in 2010.  
8-836.\*\*: . \*h: until 2014: . \*9: „Other abdominal arteries“, from 2016: . \*9 „Other abdominal or pelvic arteries“, . \*h from 2017  
\* k: until 2016: . \*b: „Arteries of thigh“, . \*k from 2017.

### (D) Amputations:

| OPS Code                    | Description                                    |
|-----------------------------|------------------------------------------------|
| <b>#A1.1 Major</b>          |                                                |
| 5-864.0-1, 5-864.2          | Hemipelvectomy / Hip disarticulation           |
| 5-864.3-5                   | Above knee amputation                          |
| 5-864.6-7                   | Knee exarticulation                            |
| 5-864.8-9, 5-864.a, 5-865.0 | Below knee amputation                          |
| 5-864.x-y                   | Amputation of extremity, not further specified |
| <b>#A1.2 Minor</b>          |                                                |
| 5-865.1-3                   | Foot amputation                                |
| 5-865.4-6                   | Forefoot and midfoot amputation                |
| 5-865.7-8                   | Toe and ray amputation                         |
| 5-865.x-y                   | Amputation of foot, not further specified      |

**Figure S1:** Regional distribution of treating units in Germany: surgical (vascular or general) units vs. other (angiology, cardiology, internal medicine) units.

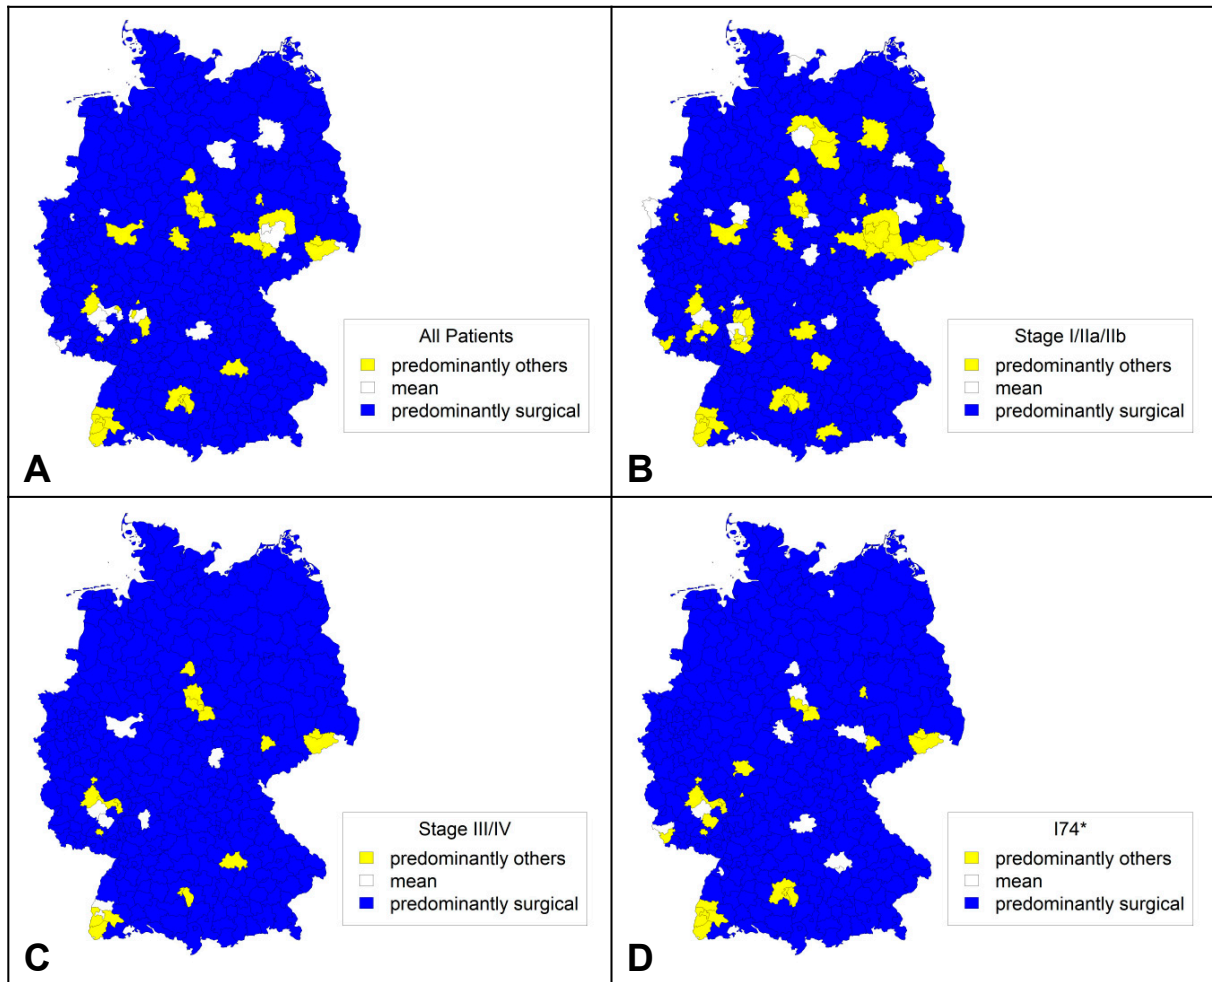

Choropleth maps showing distribution for all patients (**A**), mild peripheral arterial disease (Fontaine stages I, IIa, IIb; (**B**)), critical limb threatening ischemia (Fontaine stages III and IV; (**C**)), and arterial embolism (**D**). *Mean* is defined as the relative difference between features (i.e., cases treated by surgical or other unit) being  $\leq 10\%$  in the respective region. *Predominantly* is defined as the relative difference being  $> 10\%$ .

**Figure S2:** Regional distribution of treating units in Germany: dedicated vascular (vascular surgery or angiology) units vs. all other (cardiology, internal medicine, general surgery) units.

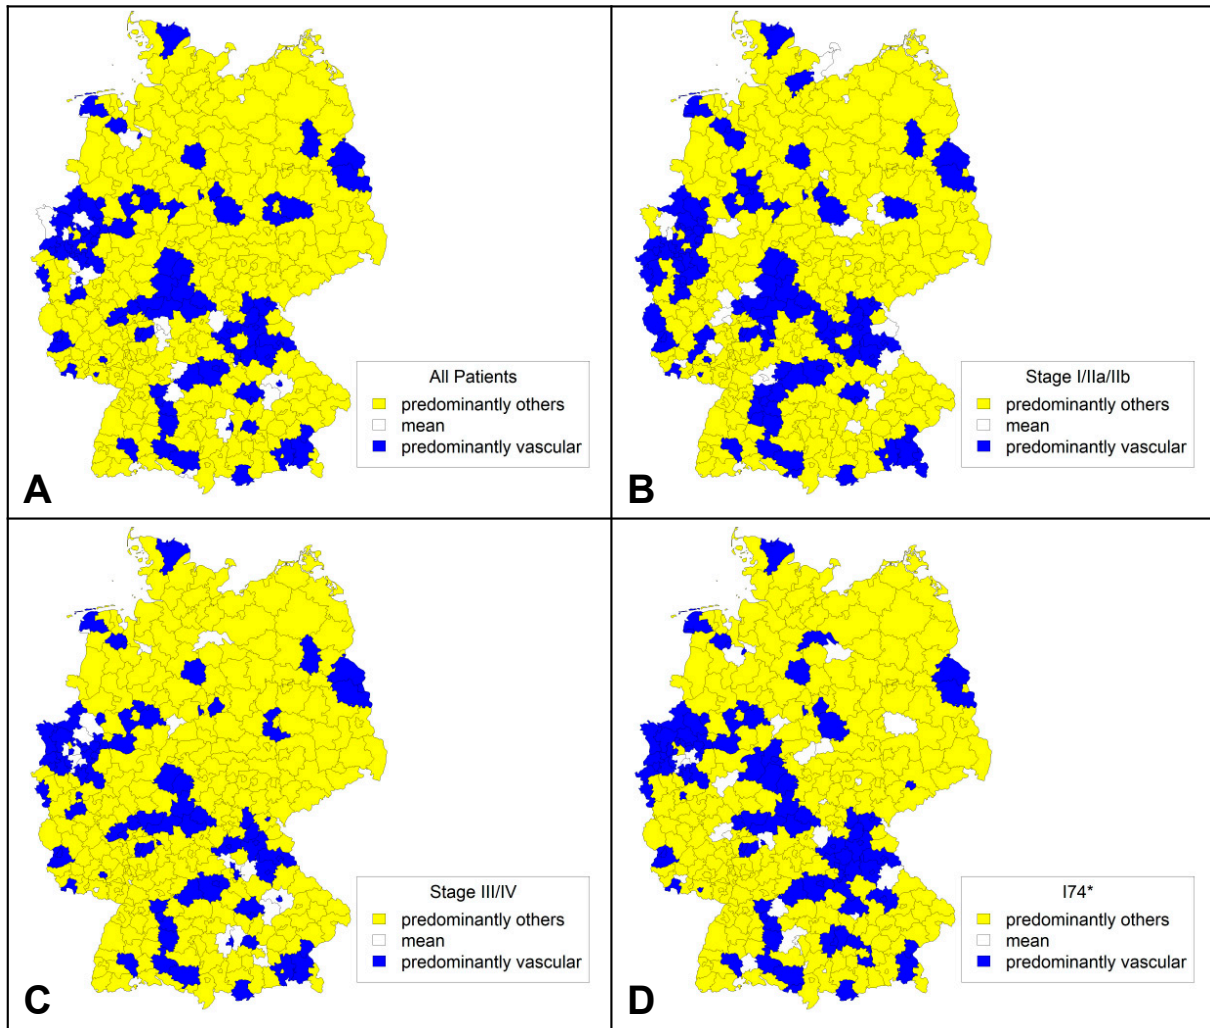

Choropleth maps showing distribution for all patients (**A**), mild peripheral arterial disease (Fontaine stages I, IIa, IIb; (**B**)), critical limb threatening ischemia (Fontaine stages III and IV; (**C**)), and arterial embolism (**D**). *Mean* is defined as the relative difference between features (i.e., cases treated by vascular or other unit) being  $\leq 10\%$  in the respective region. *Predominantly* is defined as the relative difference being  $> 10\%$ .
